# Supplementary material
Source: Springer Nature journal article supplement (https://www.springermedizin.de/resource/supplementary/12957_2013_1542_MOESM3_ESM.pdf/9563598)

Mesurement

**kBq/m<sup>2</sup> Cs137**

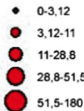

Cities of Turkey

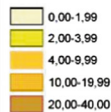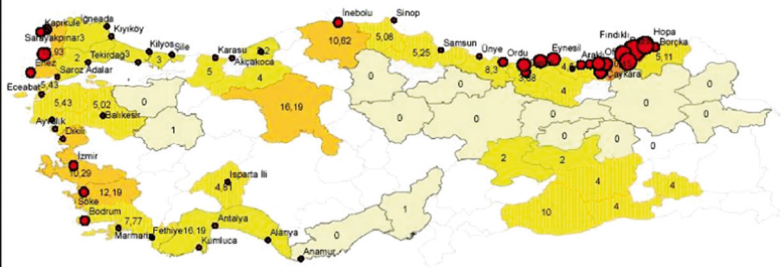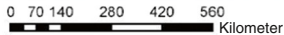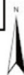

Supplement: MOESM3 [file 9563598]
